# Supplementary material for: Glucose Excursions Between States of Glycemia With Progression to Type 1 Diabetes in the Diabetes Prevention Trial–Type 1 (DPT-1)
Source: PubMed Central journal article supplement — Diabetes. 2010 Aug 3;59(10):2386–9. doi: 10.2337/db10-0534 (PMC3279562; doi:10.2337/db10-0534), 2010-08-03

### Supplemental Figure 1 (Online Appendix)

Shown are median glucose (A) and C-peptide (B) levels at each time point of the TDOGTTs and the subsequent (within 3 months) NDOGTTs in progressors to T1D. The glucose levels did not differ before 60 minutes. From 60 to 120 minutes glucose levels were markedly higher in the TDOGTTs. The C-peptide levels were similar until 120 minutes at which time they were higher in the TDOGTTs.

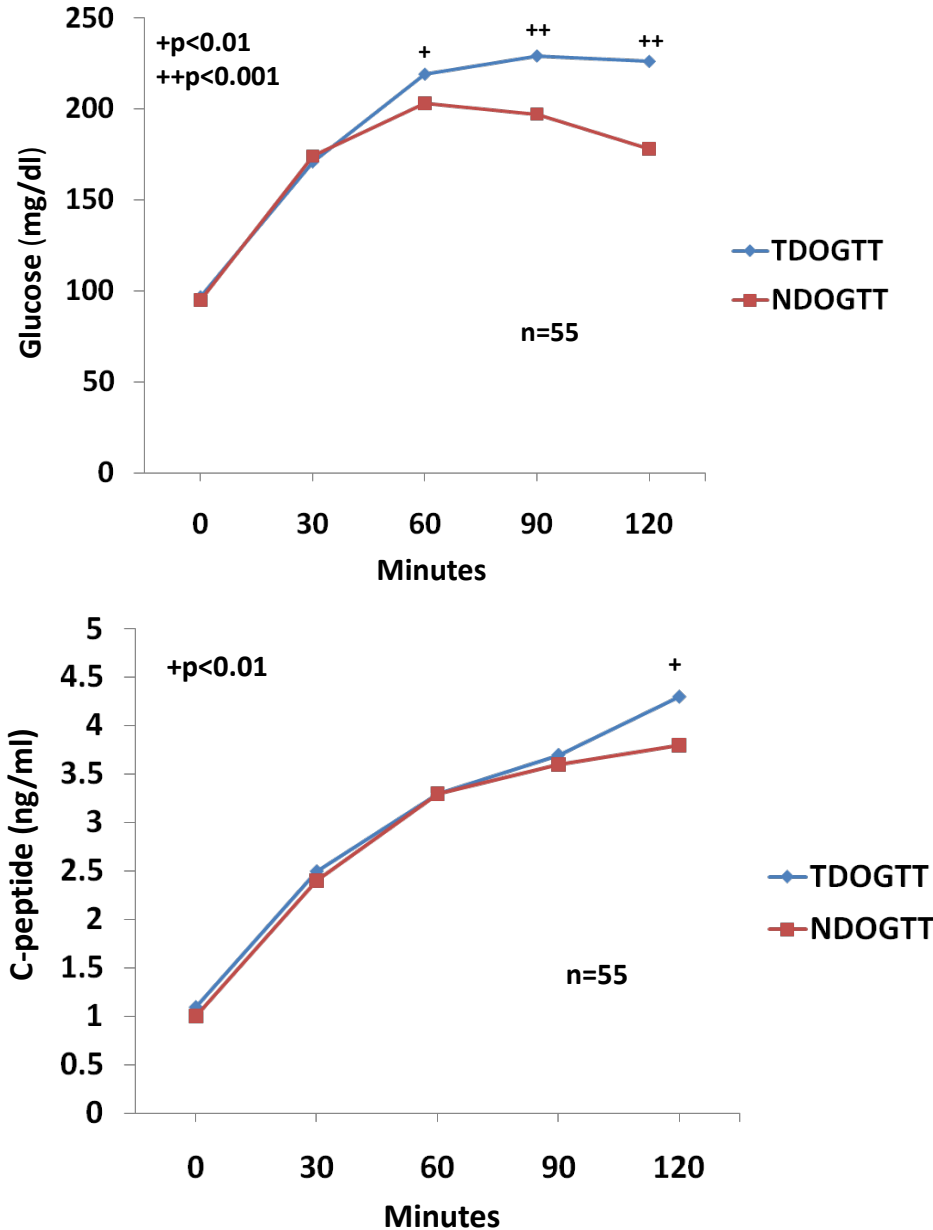

### Supplemental Figure 2 (Online Appendix)

Shown are median glucose (A) and C-peptide (B) levels at each time point of the TDOGTTs and the subsequent DOGTTs in progressors to T1D. The glucose levels are significantly higher in the DOGTTs at all time points. The C-peptide levels are significantly lower in the DOGTTs at all of the post-challenge time points after 30 minutes.

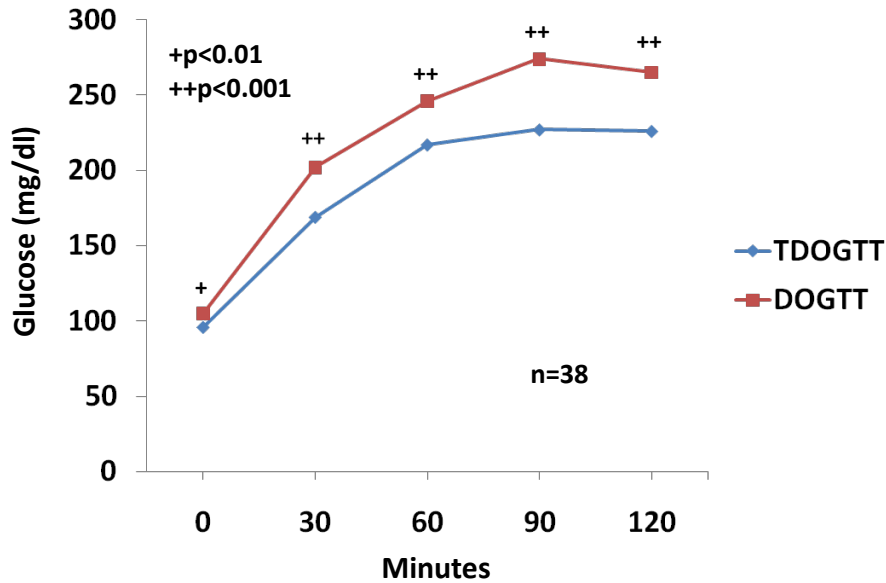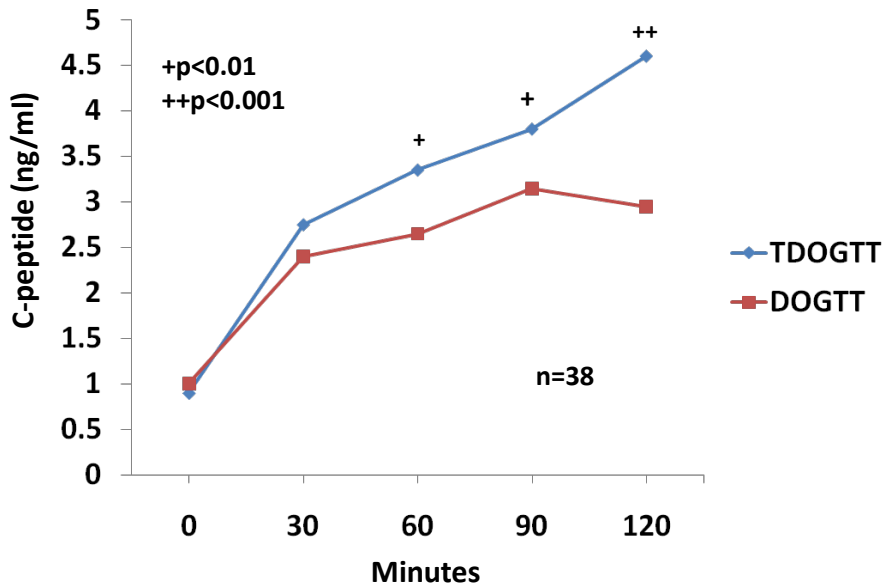

Supplement: supp_db10-0534_db100534onlineappendix.pdf [file supp_db10-0534_db100534onlineappendix.pdf]
